1       **The Effects of Leukocyte- and Platelet-Rich Plasma (L-Prp) and Pure Platelet-Rich**  
2                                           **Plasma (P-Prp) an a Rat Endometriosis Model**

3       **\*Ali Doğukan Anđın<sup>1</sup> ¶, İsmet Gün<sup>2</sup> ¶, Önder Sakin<sup>1</sup> ¶, Muzaffer Seyhan Çıkman<sup>1</sup> ¶, Zehra**  
4       **Meltem Pirioglu<sup>1</sup> ¶, Ahmet Kale<sup>1</sup> ¶, Kayhan Başak<sup>3</sup> &, Pınar Kaygın<sup>4</sup> &, Serpil Oğuztüzün<sup>4</sup> &**

5  
6       <sup>1</sup> Department of Obstetrics and Gynecology, Dr Lütfi Kırdar Kartal Training and Research  
7       Hospital, University of Health Sciences, İstanbul/TURKEY

8       <sup>2</sup> Department of Obstetrics and Gynecology, *Sultan Abdülhamid Han* Training and Research  
9       Hospital, University of Health Sciences, İstanbul/TURKEY,

10       <sup>3</sup> Department of Pathology, Dr Lütfi Kırdar Kartal Training and Research Hospital, University  
11       of Health Sciences, İstanbul/TURKEY

12       <sup>4</sup> Department of Biology, Faculty of Science and Literature, University of Kırıkkale,  
13       Kırıkkale/TURKEY

14

15

16       ¶ These authors contributed equally to this work.

17       & These authors also contributed equally to this work.

18

19

20

21       **\*Corresponding author; Ali Dogukan Angin, +905056232027, dralidogukan@gmail.com**  
22

23

24

25

26

27

## 28 **Abstract**

29       Our aim was to investigate the effect of platelet-rich plasma (PRP) derivatives, which  
30 can be produced from the patient's own blood and have minimal side effects, on  
31 endometriosis. To the best of our knowledge, this is the first study in the literature that studies  
32 the relationship between PRP and endometriosis. Endometriosis foci were created in the first  
33 operation. In the second operation (30<sup>th</sup> day) groups were formed. Group 1 (n= 8) was  
34 administered saline, group 2 (n= 7) leukocyte- and platelet-rich plasma (L-PRP), and group 3  
35 (n= 8) pure platelet-rich plasma (P-PRP). Group 4 (n= 10) was used to obtain PRP. In the last  
36 operation (60<sup>th</sup> day), the endometriotic foci were measured, and then excised. There was no  
37 statistically significant difference between the pre and post volumes of the endometriotic foci,  
38 between their volume differences and volume difference rates ( $p > .05$ ). However, it was  
39 observed that existing implant volumes in all groups decreased statistically significantly  
40 within their own groups by the end of the experiment compared to the previous volumes ( $p <$   
41  $.05$ ). When the implants were assessed through histopathological scoring in terms of edema,  
42 vascular congestion, inflammatory cell infiltration, hemorrhage, epithelial line, and  
43 hemosiderin accumulation and immunohistochemical staining in terms of VEGF, there was  
44 no significant difference in the comparison between the groups. Although L-PRP and P-PRP  
45 generated more reduction in the endometriosis foci, they did not create any statistical  
46 differences.

## 47 **Introduction**

48       Endometriosis, which is described as the presence of endometrial gland and stroma  
49 outside the uterine cavity, is an important women's health problem seen in 6–10% of women  
50 that causes degradation in the quality of life with clinical effects, such as infertility,

51 dysmenorrhea, dyspareunia and chronic pelvic pain<sup>1-4</sup>. Its pathophysiology has not yet been  
52 fully resolved, and an effective treatment for it has not yet been found<sup>5,6</sup>.

53 Research has shown that cytokine levels rise in the peritoneal fluid of endometriosis  
54 patients<sup>7</sup>. In patients with endometriosis, an angiogenetic activity of peritoneal fluid and  
55 increased levels of vascular endothelial growth factor (VEGF) are observed<sup>8,9</sup>. In various  
56 experimental studies in the treatment of endometriosis, endometriotic foci have been found to  
57 shrink and VEGF levels have been found to decrease<sup>10,11</sup>.

58 The healing properties of platelet-rich plasma (PRP) and platelet- and leukocyte-rich  
59 plasma in tissues have also been subject to numerous research studies in recent years. This  
60 plasma contains a high proportion of platelets. Platelets are also known to contain many  
61 growth factors. Platelet-derived growth factor (PDGF), transforming growth factor beta (TGF-  
62 B), epidermal growth factor (EGF), insulin-like growth factor (IGF) and vascular endothelial  
63 growth factor (VEGF) can be counted among these factors<sup>12,13</sup>. With such features, PRP can  
64 show positive effects on many systems. Such effects of it include many systems such as scalp,  
65 skin, heart, bones, cartilage, tendons, liver, kidney, genital tract, ovaries, endometrium and  
66 infertility treatments<sup>14-20</sup>. PRP can be in two different forms: L-PRP (i.e., leukocyte- and  
67 platelet-rich) and P-PRP (leukocyte-poor or pure platelet-rich). Although they are similar  
68 products, their contents such as cytokines and growth factors are different. L-PRP has a  
69 higher proportion of leukocyte, TNF- $\alpha$  and IL-1 $\beta$  concentration<sup>21</sup>. To the best of our  
70 knowledge, there is no study in the literature investigating whether PRP administration  
71 increases or decreases endometriosis.

72 Our aim was to investigate the effect of two forms of PRP (L-PRP and P-PRP) on  
73 endometriosis, which had never been administered in endometriosis, but was known to be  
74 effective in many areas.

## 75 **Materials and Methods**

76 The study was carried out in the Animal Experiments Laboratory, and approval was  
77 received from UNIVERSITY OF HEALTH SCIENCES Hamidiye Animal Experiments  
78 Local Ethics Committee (No:46418926-605.02 Date: 2018-01/01, 2019-01/19)

79 For the experiment, 34 4-month-old, 250-300 gr, Sprague Dawley type female rats were  
80 used.

### 81 **First operation: Creation of an endometriosis model**

82 The rats (n= 24) were administered 10% ketamine (80 mg/kg Ketalar; Eczacibasi,  
83 Istanbul, Turkey) and 2% xylazine chloride (15 mg/kg, Rompun; Bayer Health Care LCC,  
84 Kansas, KS) intraperitoneally for anesthesia prior to laparotomy. Abdomens were shaved and  
85 cleaned with iodine (Povidone-iodine 10% solution, Batticon; Adeka Laboratories, Istanbul,  
86 Turkey), and each abdomen was entered through a 5-cm vertical incision. As defined by  
87 Vernon and Wilson, foci were formed by implanting the part taken from the rat uterus to the  
88 abdominal wall through a surgical intervention using Uygur's modification<sup>22,23</sup>. To do that, a  
89 .5 cm section of the left uterine horn was excised at a distance of 1 cm from the ovary. The  
90 remaining uterine horn was sutured with 2/0 polyglactin absorbable suture, and the bleeding  
91 was controlled. The tissue that was taken was cut longitudinally and sutured without  
92 separating the myometrium into the right abdominal peritoneal inner surface with 5/0  
93 polypropylene non-absorbable suture by placing the endometrial portion inward, and an  
94 implantation was achieved (to ensure the endometriosis model) (Fig 1). The implants were  
95 washed with 5 cc saline flush to prevent possible adhesions and dryness. The abdomen was  
96 closed by suturing the peritoneum, fascia and skin with 4/0 polyglactin. After the operation,  
97 50 mg/ kg/ day Cefazolin sodium (IE Ulagay Ilac Sanayi, Istanbul, Turkey) was administered  
98 intraperitoneally for 3 days. Each rat was operated in 20 minutes in order to prevent the room  
99 air temperature from disturbing the dryness of the tissue. The rats were caged individually in a

100 controlled environment (at 21 °C room temperature and 60% humidity) with 12 h light/dark  
101 cycles, and were fed ad libitum.

102 Fig 1: The endometrial focus on the inner abdominal surface of the rat

### 103 **Second operation: Creation of the groups**

104 The second laparotomy was administered 1 month later in order to assess the presence  
105 of endometrial foci, their transformation into a cystic structure, and their dimensions. The  
106 abdomen was entered through the previous incision (anesthesia, cleaning and antibiotics were  
107 administered in the same way as in the first operation). The implants were found to be  
108 successful in all rats (Fig 1). The implant dimensions were measured and the global  
109 endometriotic focal volumes of the implants were calculated using the prolate ellipsoid  
110 formula ( $V \text{ mm}^3 = .52 \times A \times B \times C$  where A, B, and C are width, length, and height,  
111 respectively)<sup>24</sup>.

112 The rats were divided into 3 groups with random selection:

113 Group1: Control group (n= 8): 0,1 cc SF was applied on the implant.

114 Group 2: Leukocyte- and platelet-rich L-PRP group (n= 7): 0,1 cc L-PRP was applied on the  
115 implant.

116 Group 3: Pure platelet-rich P-PRP group (n= 8): 0,1 cc P-PRP was applied on the implant.

117 A total of 10 rats were decapitated after the blood was drawn for the preparation of the  
118 heterologous PRP. All the injections were applied once on the lesion in all groups. After that,  
119 the abdomen was closed by suturing the peritoneum, fascia and skin with 4/0 polyglactin. A  
120 rat in Group 2 died 3 days later, and there were 7 rats remaining in the group.

### 121 **Third operation: Termination and pathological examination**

122 A laparotomy was performed for the third and last time, for final assessments 1 month  
123 later. In the last 5 days, vaginal smears were sampled from all rats to assess estrogen cycle.  
124 The cycle status was assessed by microscopic examination through the Papanicolaou staining  
125 method. The vaginal smears were taken in the form of swabs from the vaginal wall by using a  
126 cotton brush. The estrogen cycle was determined by the cornification of the cells formed by  
127 the estrogen effect and loss of leukocytes<sup>24</sup>. The rats that were in their cycles were selected.  
128 The pre-operative anesthesia and cleaning were performed as before. The abdomen was  
129 entered through the previous incision line. The endometriosis foci were measured by the same  
130 researcher using the same method (the prolate ellipsoid formula) as stated above, blindly by  
131 not knowing which group the foci were in. After that they were excised. Then, the rats were  
132 decapitated (cardiac excision) and were destroyed by red medical waste bins. The tissues that  
133 were excised were sent to the laboratory within 10% formaldehyde for histopathological and  
134 immunohistochemical examination. The pre- and post-treatment implant volumes, post-  
135 treatment histopathological examination scores of the implants and immunohistochemical  
136 staining scores for the post-treatment VEGF in the implants were measured and compared.

### 137 **Preparation of PRPs**

138 Ten additional rats were used to obtain blood for PRP. These rats (n= 24) were  
139 administered 10% ketamine (80 mg/ kg Ketalar; Eczacibasi, Istanbul, Turkey) and 2%  
140 xylazine chloride (15 mg/ kg, Rompun; Bayer Health Care LCC, Kansas, KS)  
141 intraperitoneally for anesthesia, and their blood samples were drawn through cardiac  
142 puncture. The blood was anticoagulated using acid-citrate dextrose solution A (ACD-a) at a  
143 rate of 1/9. A total of 38-40 cc PRP (L-PRP and P-PRP) was obtained from the 10 rats.

### 144 **Preparation of L-PRP**

145 L-PRP was prepared using the double centrifuge method based on buffy coat. The  
146 whole blood from five rats was centrifuged at room temperature for 10 minutes at 250 g, and

147 it was ensured that the blood was separated into three layers: Erythrocytes at the bottom,  
148 buffy coat in the middle (rich in platelets, leukocytes and fibrinogen), and plasma containing  
149 platelets at the top. The platelets-containing plasma and buffy coat were later transferred into  
150 a new tube. A large portion of the platelets, leukocytes, and fibrinogen was re-centrifuged for  
151 10 minutes at 1000 g to form precipitate. The supernatant plasma was thrown away, and the  
152 precipitated platelets were re-suspended in the residue plasma to obtain L-PRP<sup>25,26</sup>.

### 153 **Preparation of P-PRP**

154 P-PRP is a plasma-based method that concentrates platelets and eliminates leukocytes  
155 and erythrocytes. The anticoagulated whole blood that was drawn from the five rats was  
156 centrifuged at room temperature for 10 minutes at 160 g to separate platelets-containing  
157 plasma (rich in leukocytes) from erythrocytes and the buffy coat. Attention was paid to  
158 prevent the buffy coat and erythrocyte contamination. The platelets-containing plasma was  
159 then transferred to a new tube and centrifuged for 15 minutes at 250 g. The supernatant  
160 plasma was thrown away, and the precipitated platelets were re-suspended in the residue  
161 plasma to obtain L-PRP<sup>25,26</sup>.

### 162 **Histopathological examination**

163 All pathological examinations were blindly carried out by a single expert (K.A.).  
164 Biopsies were fixated for 24 hours in 10% formaldehyde. Paraffin blocks were created, and  
165 the blocks were cut in thickness of 5  $\mu$ m. A total of 5 sections were obtained for each  
166 material, stained with hematoxylin eosin (HE) and assessed with a light microscope. Edema,  
167 vascular congestion, inflammatory cell infiltration, fresh hemorrhage and hemosiderin  
168 formations were noted (scoring 0–3 where 0= None, 1= Light, 2= Medium, 3= Heavy).  
169 Histopathological diagnosis was determined by the recognition of endometrial tissue, gland  
170 and stroma, and by the determination of endometrial lining and luminal formation. The  
171 presence of endometrial cells in autografts was assessed semi-quantitatively. The pathological

172 evaluation of the uterine autografts was carried out as described in an earlier method — A  
173 well-preserved epithelial line= 3 points, a moderately preserved epithelium with leukocyte  
174 infiltration= 2 points, a poor epithelium with rare epithelial cells= 1 point, and no epithelium=  
175 0 points<sup>24</sup> (Fig 2).

176 **Fig 2: Histopathological appearance and immunohistochemical staining of endometrial**  
177 **implants**

## 178 **Immunohistochemical Staining**

179 Tissues were fixed in 10% buffered formalin and embedded in paraffin blocks. Sections  
180 that were 4 µm thick were cut, and one section was stained with haematoxylin-eosin to  
181 observe the tissue morphology. For immunohistochemistry, endogenous peroxidase activity  
182 was blocked by incubating the sections in 1% hydrogen peroxide (v/v) in methanol for 10  
183 minutes at room temperature (RT). The sections were subsequently washed in distilled water  
184 for 5 minutes, and antigen retrieval was performed for 3 minutes using 0.01 M citrate buffer  
185 (pH 6.0) in a domestic pressure cooker. After washing in distilled water, the sections were  
186 transferred in 0.05M Tris-HCl (pH 7.6) containing 0.15 M sodium chloride (TBS). The  
187 sections were incubated at RT for 10 minutes with super block (SHP125) (ScyTek  
188 Laboratories, USA) to block nonspecific background staining. The sections were then covered  
189 with the primary antibodies diluted 1:25 for anti-VEGF in TBS at 4°C overnight (Anti-VEGF  
190 (Novus Biologicals NB100-698) After washing in TBS for 15 minutes, the sections were  
191 incubated at RT for biotinylated link antibody (SHP125) (ScyTek Laboratories, USA). Then,  
192 treatment was followed with Streptavidin/HRP complex (SHP125) (ScyTek Laboratories,  
193 USA). Diaminobenzidine was used to visualise peroxidase activity in the tissues. Nuclei were  
194 lightly counterstained with haemotoxylene, and then the sections were dehydrated and  
195 mounted. Both positive and negative controls were included in each run.



196 Immunoreactive cells were recorded during the immunohistochemical examination for  
197 VEGF with the following scoring: 0=negative staining, 1= < 33% positive staining, 2= 33–  
198 66% positive staining, 3= > 66% positive staining (Fig 2). The immunohistochemical staining  
199 was evaluated by the same histologist blindly by a semi-quantitative method using the H-  
200 score. For each section, positive areas were scored at  $\times 400$  magnification from 0 to 3+ with  
201 no staining (0), weak (1+), moderate (2+), and strong (3+). H-score was calculated as  $H = \sum P_i$   
202  $(I + 1)$ . 'Pi' represents the density of immunohistochemical staining and 'I' is the percentage  
203 of the stained cells<sup>10</sup>.

## 204 Results

205 Three groups were formed in the study — Group 1: Control, Group 2: L-PRP, and  
206 Group 3: P-PRP. It was confirmed by the pathologist that the foci were histopathologically  
207 endometriosis in all groups. Among the groups, the pre and post volumes of the endometriotic  
208 foci created, volume differences between them and volume difference rates between them are  
209 seen in Table 1. Considering this table, there is no statistically significant difference between  
210 the groups ( $p > .05$ ). However, it was observed that existing implant volumes in all groups  
211 decreased statistically significantly within their own groups by the end of the experiment  
212 compared to the previous volumes ( $p < .05$ ) (Fig 3). When the implants were assessed through  
213 histopathological scoring in terms of edema, vascular congestion, inflammatory cell  
214 infiltration, and fresh hemorrhage, there was no significant difference in the comparison  
215 between the groups in terms of the total score that was obtained (Table 1).

216 Table 1: Comparison of histopathological total score and volume values

| parameters   | Group 1<br>(n=8) | Group 2<br>(n=7) | Group 3<br>(n=8) | TOTAL       | p                 |
|--------------|------------------|------------------|------------------|-------------|-------------------|
| First volume | 61.95±54.76      | 37.67±26.04      | 29.00±13.60      | 43.10±37.53 | .616 <sup>c</sup> |

|                                 |                         |                         |                         |                              |                   |
|---------------------------------|-------------------------|-------------------------|-------------------------|------------------------------|-------------------|
| <b>Last volume</b>              | 11.05±15.37             | 2.38±4.50               | 6.79±9.56               | 6.93±11.07                   | .228 <sup>c</sup> |
| <b>Volume difference</b>        | 50.90±54.53             | 35.29±27.93             | 22.20±14.16             | 36.16±37.05                  | .314 <sup>a</sup> |
| <b>Percentage of difference</b> | 67.86±68.11             | 88.40±22.03             | 79.41±30.61             | 78.13±44.49                  | .384 <sup>c</sup> |
| <b>Total score*</b>             | 3.88±1.36               | 4.86±1.57               | 3.63±1.51               | 4.09±1.50                    | .264 <sup>a</sup> |
| <b>p</b>                        | <b>.025<sup>b</sup></b> | <b>.018<sup>b</sup></b> | <b>.012<sup>b</sup></b> | <b>&lt; .001<sup>b</sup></b> |                   |

217 The data are given as average ± standard deviation. \*Total score: Edema + vascular  
 218 congestion + inflammatory cell infiltration + fresh hemorrhage. <sup>a</sup>ANOVA, <sup>b</sup>Wilcoxon Signed  
 219 Ranks, first volume and last volume comparison, <sup>c</sup>Kruskal-Wallis

220 **Fig 3: Pre and post implant volumes**

221 No significant differences were found when the groups were compared in terms of the  
 222 percentages of VEGF score measured immunohistochemically, the percentages of epithelial  
 223 line score used to evaluate the presence of endometriosis, and the percentages of score  
 224 indicating hemosiderin accumulated in the implants (Table 2) (p > .05).

225 Table 2: Comparison of histopathological and immunohistochemical parameters

| <b>parameters</b>       | <b>score</b> | <b>Group 1<br/>(n=8)</b> | <b>Group 2<br/>(n=7)</b> | <b>Group 3<br/>(n=8)</b> | <b>TOTAL</b> | <b>p</b> |
|-------------------------|--------------|--------------------------|--------------------------|--------------------------|--------------|----------|
| <b>Epithelial line*</b> | <b>0</b>     | 26.1 (6)                 | 30.4 (7)                 | 21.7 (5)                 | 78.3 (18)    | 0,398    |
|                         | <b>1</b>     | 4.3 (1)                  | 0.0 (0)                  | 0.0 (0)                  | 4.3 (1)      |          |
|                         | <b>2</b>     | 0.0 (0)                  | 0.0 (0)                  | 4.3 (1)                  | 4.3 (1)      |          |
|                         | <b>3</b>     | 4.3 (1)                  | 0.0 (0)                  | 8.7 (2)                  | 23 (3)       |          |
| <b>Hemosiderin**</b>    | <b>0</b>     | 8.7 (2)                  | 4.3 (1)                  | 17.4 (4)                 | 30.4 (7)     | 0,292    |

|                |          |            |            |            |            |       |
|----------------|----------|------------|------------|------------|------------|-------|
|                | <b>1</b> | 17.4 (4)   | 13.0 (3)   | 17.4 (4)   | 47.8 (11)  |       |
|                | <b>2</b> | 8.7 (2)    | 13.0 (3)   | 0.0 (0)    | 21.7 (5)   |       |
| <b>VEGF***</b> | <b>H</b> | 0.938±1.74 | 1.214±1.34 | 0.925±0.57 | 1.017±1.25 | 0,893 |

226 Data are given in % (n); \*Epithelial scoring \*Scoring for hemosiderin formations \*\*\* H-  
227 score. Data are given as mean ± standard deviation.

## 228 **Statistical Analysis**

229 For statistical studies, the IBM SPSS statistics version 24 was used. The Shapiro-Wilk  
230 and Kolmogorov Smirnov tests were used to test the normality of distributions. The one-way  
231 analysis of variance (ANOVA) was used when comparing three or more groups with a normal  
232 distribution, whereas the Kruskal Walls test was used when comparing three or more groups  
233 with a non-normal distribution. Following that, the Mann Whitney U test with Bonferroni  
234 correction was used for pairwise comparisons. The Chi-square test was used when comparing  
235 categorical variables. Paired samples t-tests or the Wilcoxon test were used depending on the  
236 conditions in repeated pairwise measurements at different times in the dependent groups. A p  
237 value less than .05 was considered as statistically significant.

## 238 **Discussion**

239 Endometriosis, which has an important place in female infertility, and whose treatment  
240 and pathophysiology are still not certain, has been considered a serious disease today. With  
241 the surgery applied in endometriomas, infertile patients face a risk of reduction of ovary  
242 reserve<sup>27,28</sup>. Surgical interventions in particularly deep endometriosis can lead to serious  
243 complications<sup>29</sup>. Therefore, noninvasive therapies are noteworthy. In this case, PRP, which is  
244 safe because it is produced from the patient's own blood<sup>30,31</sup> and may be an alternative to  
245 surgery and other medications with many side effects, as a minimally invasive agent in the  
246 treatment of endometriosis.

247           There are many studies on endometriosis models and the effects of different drugs in  
248 rats. In general, comparisons in these studies have been performed based on volumes prior to  
249 and after drug administration, histopathological scores, and various immunohistochemical and  
250 biochemical assessments. In the rat experiment, where Yıldırım et al. examined the effects of  
251 etanercept on endometriosis, they detected significant reduction in the pre- and post-treatment  
252 focal volumes in the pharmaceutical group<sup>32</sup>. No reduction was observed in the control group.  
253 They observed that the volume of the endometriotic foci had shrunk spontaneously within 6  
254 weeks in the 2nd control group which did not receive any medication. However, they did not  
255 evaluate the rate of volume change between the groups. Moreover, they administered estrogen  
256 in certain periods in all groups except for the 2nd control group<sup>32</sup>. Islimiye et al. also carried  
257 out a similar experiment with etanercept, but they did not use estrogen; they found that the  
258 volume of the implant increased in the control group, decreased in the etanercept group and  
259 that this change was significant compared to the control group<sup>24</sup>. In another study, again,  
260 where estrogen was not used, the volume after the treatment was significantly less compared  
261 to the control group in resveratrol and leuprolide acetate groups<sup>10</sup>. We also found in our study,  
262 where we did not administer estrogen, that implant volumes in PRP groups were significantly  
263 decreased after the treatment ( $p < .05$ ). However, this significant decline was similarly present  
264 in the control group, and the rate of volume change did not show any significant difference  
265 between the groups (Table 1).

266           Another parameter that is compared in endometriosis studies is the histopathological  
267 evaluation of the endometrial glandular and stromal structures that are carried out semi-  
268 quantitatively. In a number of studies, there have been significantly lower values compared to  
269 the control group after various treatments, while in some others, there have been no  
270 significant changes<sup>10,24,32</sup>. We did not observe any significant differences in the post-treatment  
271 groups in which we carried out epithelial assessments similar to the studies in the literature

272 (Table 2). However, the point is that in the L-PRP group, the epithelial score was 0. There  
273 were no cells. L-PRP had almost destroyed the endometrial foci. Nevertheless, this  
274 circumstance had not been reflected in the accumulation of hemosiderin. It was similar in  
275 every group (Table 2). Hemosiderin is a significant indicator in the assessment of  
276 endometriosis<sup>33,34</sup>. In other words, it seems that the endometrial focus examination should not  
277 be carried out based on a single factor. We also assessed the inflammatory changes in  
278 histopathological scoring as a total score in our study but did not observe any differences  
279 between the groups (Table 1).

280 While there are many studies of PRP, which includes several growth factors, in different  
281 disciplines, studies conducted in the field of gynecology and obstetrics are limited in the  
282 literature. It has been stated that PRP contributes to the endometrial growth and thickening  
283 and may be effective in infertility in patients with a thin and weak endometrium<sup>35-37</sup>. Farimani  
284 et al. have stated that local PRP administration prior to embryo transfer in recurrent  
285 implantation failures may improve the success of implantation<sup>38</sup>. PRP can also suppress the  
286 inflammatory process in the development of endometriosis<sup>39</sup>.

287 PRP with its mitogenic effect is important in the renewal and repair of tissues; it does  
288 this through its growth factors such as dense platelet-related TGF- $\beta$  (transforming growth  
289 factor- $\beta$ ) and VEGF, and cytokines<sup>40</sup>. In conclusion, PRP seems to be suppressing the  
290 inflammatory process<sup>41</sup>. TGF- $\beta$  is one of the cytokines involved in adhesion  
291 pathophysiology<sup>42</sup>. In the study of Murat et al., adhesions were decreased after the PRP  
292 administration; additionally, the TGF- $\beta$  expression in the adhesion foci where PRP was  
293 administered has been shown to decrease<sup>25</sup>. This means that although PRP contains TGF- $\beta$ , it  
294 both reduced adhesion and decreased TGF- $\beta$  expression in adhesions. In another study on the  
295 healing of femoral avascular necrosis, TGF increased significantly in the PRP group<sup>43</sup>. VEGF  
296 is a cytokine that has a role in angiogenesis and is involved in the pathophysiology of

297 endometriosis<sup>44</sup>. Resveratrol and similar drugs that inhibit the release of VEGF have been  
298 shown to reduce endometriosis and cause decreased levels of VEGF in foci<sup>45,46</sup>. Although it  
299 has been shown that VEGF levels increase in the tissue with PRP treatment, there are also  
300 studies that show that there is no increase and that the treatment does not cause any  
301 difference<sup>47-49</sup>. We did not see any significant difference between the VEGF levels in the post-  
302 treatment implants in our study, either (Table 2). The tissues in which the effects of PRP have  
303 been examined in the literature are different tissues of the body, and perhaps the reason for  
304 this difference in the studies may be due to the possibility that the effect of PRP varies  
305 depending on the tissue. Therefore, other studies to be carried out in similar tissues are  
306 needed.

307       There are also cytokines such as IL-1, IL-8 in PRP<sup>50</sup>. Marini et al. showed that PRP  
308 reduced IL-1B and IL-8 release in endometrial tissues and they attributed the anti-  
309 inflammatory effect of PRP to this reduction<sup>51</sup>. Some of the cytokines held responsible for the  
310 pathophysiology, which are shown to increase in the peritoneal fluid in endometriosis, are IL-  
311 1 and IL-8<sup>44</sup>. That is, although PRP contains IL-1 and IL-8, it may reduce the release of these  
312 cytokines in endometrial tissues. Therefore, PRP can be remedial in endometriosis. In  
313 different studies, however, IL1-B has been shown to increase, and similarly, also decrease  
314 with different L-PRPs and P-PRPs<sup>52,53</sup>. In our study, although the foci got smaller with P-PRP  
315 and L-PRP, we cannot say that PRP has a therapeutic effect on endometriosis since this  
316 reduction was also seen in the control group, and the difference in the reduction of volume  
317 was not significant. As Wang et al. have pointed out, the number of platelets, cytokines and  
318 factors in PRP may vary depending on how the PRP has been prepared, and these changes  
319 may explain the different outcomes in the literature<sup>53</sup>.

320       In our study, PRP derivatives were applied on the implant once in the form of an  
321 injection. Perhaps the application of the injections into the implant or intravenously, or

322 simultaneously application of them with repeated doses at certain intervals could result in  
323 different and effective results. We can think of a limitation of our study that we did not  
324 histopathologically examine the similar implants in the first month in which the foci were  
325 found to have been formed. They have not been examined in many studies, either. We also  
326 performed an endometrial implantation, as in most past studies<sup>22,23</sup>. To the best of our  
327 knowledge, our current study is the first study of the relationship between PRP and  
328 endometriosis, which can be considered as a preliminary study. Although our results were not  
329 significant, it was promising that the PRP foci did not grow, and they did not stay the same —  
330 they shrank. Therefore, in order to investigate the effect of PRP, which has many important  
331 features, on endometriosis, there is a need for larger research studies which have different  
332 applications with different doses.

## 333 **Conclusion**

334 In conclusion, the endometriosis foci were shrinking over time. This reduction was  
335 observed in all groups and was significant. However, the shrinking of endometriosis foci did  
336 not show any statistically significant difference among the groups. Moreover, there was no  
337 difference between the groups in terms of epithelial score, hemosiderin deposits, VEGF and  
338 total score. In other words, although both L-PRP and P-PRP generated more reduction in the  
339 endometriosis foci, they did not create any statistical differences.

## 340 **Acknowledgments**

341 All authors have made significant contributions to the study.

## 342 **References**

- 343 1. Kohl Schwartz AS, Wölfler MM, Mitter V, Rauchfuss M, Haeberlin F, Eberhard M.  
344 Et al. Endometriosis, especially mild disease: a risk factor for miscarriages. *Fertil*  
345 *Steril.* 2017; 108(5): 806-814.e2.

- 346 2. Marinho MCP, Magalhaes TF, Fernandes LFC, Augusto KL, Brilhante AVM, Bezerra  
347 LRPS. Quality of Life in Women with Endometriosis: An Integrative Review. *J*  
348 *Womens Health (Larchmt)*. 2018; 27(3): 399-408.
- 349 3. Tremellen K, Thalluri V. Influence of Endometriosis on Assisted Reproductive  
350 Technology Outcomes: A Systematic Review and Meta-analysis. *Obstet Gynecol*.  
351 2015; 125(6): 1498-9..
- 352 4. Rush G, Misajon R. Examining Subjective Wellbeing and Health-related quality of  
353 life in women with Endometriosis. *Health Care Women Int*. 39(3): 303-321.
- 354 5. Gordts S, Koninckx P, Brosens I. Pathogenesis of deep endometriosis. *Fertil Steril*.  
355 2017; 108(6): 872-885.
- 356 6. Daraï E, Ploteau S, Ballester M, Bendifallah S. Pathogenesis, genetics and diagnosis  
357 of endometriosis. *Presse Med*. 2017; 46(12 Pt 1): 1156-1165.
- 358 7. Harada T, Iwabe T, Terakawa N. Role of cytokines in endometriosis. *Fertil Steril*.  
359 2001; 76: 1-10.
- 360 8. McLaren J, Prentice A, Charnock-Jones DS, Smith SK. Vascular endothelial growth  
361 factor (VEGF) concentrations are elevated in peritoneal fluid of women with  
362 endometriosis. *Hum Reprod*. 1996; 11: 220-3.
- 363 9. Oosterlynck DJ, Meuleman C, Sobis H, Vandeputte M, Koninckx PR. Angiogenic  
364 activity of peritoneal fluid from women with endometriosis. *Fertil Steril*. 1993; 59:  
365 778-82.
- 366 10. Tekin YB, Guven S, Kirbas A, Kalkan Y, Tumkaya L, Guven ESG. Is resveratrol a  
367 potential substitute for leuprolide acetate in experimental endometriosis? *European*  
368 *Journal of Obstetrics & Gynecology and Reproductive Biology*. 2015; 184: 1–6.
- 369 11. Uzunlar Ö, Ozyer Ş, Ustun YE, Moraloglu Ö, Gulerman HC, Caydere M. Et al.  
370 Effects of repeated propranolol administration in a rat model of surgically induced  
371 endometriosis *European Journal of Obstetrics & Gynecology and Reproductive*  
372 *Biology*. 2014; 182: 167–171.
- 373 12. Yılmaz S, Kaya E, Comakli S. Vitamin E ( $\alpha$  tocopherol) attenuates toxicity and  
374 oxidative stress induced by aflatoxin in rats. *Adv Clin Exp Med*. 2017; 26(6): 907-  
375 917.
- 376 13. Pala Ş, Atilgan R, Kuloğlu T, Kara M, Başpınar M, Can B, et al. Protective effects of  
377 vitamin C and vitamin E against hysterosalpingography- induced epithelial  
378 degeneration and proliferation in rat endometrium. *Drug Des Devel Ther*. 2016;  
379 15(10): 4079-4089.



- 380 14. Molavi M, Razi M, Cheraghi H, Khorramjouy M, Ostadi A, Gholirad S. Protective  
381 effect of vitamin E on cypermethrin-induced follicular atresia in rat ovary: Evidence  
382 for energy dependent mechanism. *Vet Res Forum*. 2016; 7(2): 125–132.
- 383 15. Hoeflerlin LA, Huynh QK, Mietla JA, Sell SA, Tucker J, Chalfant CE, et al. The lipid  
384 portion of activated platelet rich plasma significantly contributes to its wound healing  
385 properties. *Adv Wound Care*. 2015; 4(2): 100–109.
- 386 16. Demirbag S, Cetinkursun S, Tasdemir U, Ozturk H, Pekcan M, Yesildaglar N.  
387 Comparison of hyaluronate/carboxymethylcellulose membrane and melatonin for  
388 prevention of adhesion formation in a rat model. *Hum Reprod*. 2005; 20(7): 2021–  
389 2024.
- 390 17. Ferrando J, García-García SC, González-de-Cossío AC, Bou L, Navarra E. A Proposal  
391 of an Effective Platelet-rich Plasma Protocol for the Treatment of Androgenetic  
392 Alopecia. *Int J Trichology*. 2017; 9(4):165-170..
- 393 18. Martini LI, Via AG, Fossati C, Randelli F, Randelli P, Cucchi D. Single Platelet-Rich  
394 Plasma Injection for Early Stage of Osteoarthritis of the Knee. *Joints*. 2017; 5(1):2-6.
- 395 19. Unlu MC, Kivrak A, Kayaalp ME, Birsel O, Akgun I. Peritendinous injection of  
396 platelet-rich plasma to treat tendinopathy: A retrospective review. *Acta Orthop  
397 Traumatol Turc*. 2017; 51(6): 482-487.
- 398 20. Yang WY, Han YH, Cao XW, Pan JK, Zeng LF, Lin JT, et al. Platelet-rich plasma as  
399 a treatment for plantar fasciitis: A meta-analysis of randomized controlled trials.  
400 *Medicine (Baltimore)*. 2017; 96(44): e8475.
- 401 21. Jia J, Wang S, Ma L, Yu J, Guo Y, Wang C. The Differential Effects of Leukocyte-  
402 Containing and Pure Platelet-Rich Plasma on Nucleus Pulposus-Derived  
403 Mesenchymal Stem Cells: Implications for the Clinical Treatment of Intervertebral  
404 Disc Degeneration. *Stem Cells Int*. 2018; 2018: 7162084.
- 405 22. Vernon MW, Wilson EA. Studies on the surgical induction of endometriosis in the rat.  
406 *Fertil Steril*. 1985; 44:684–694
- 407 23. Uygur D, Aytan H, Zergeroglu S, Batioglu S. Leflunomide—an immunomodulator—  
408 induces regression of endometrial explants in a rat model of endometriosis. *J Soc  
409 Gynecol Investig*. 2006; 13: 378–383
- 410 24. Islimye M, Kilic S, Zulfikaroglu E, Topcu O, Zergeroglu S, Batioglu S. Regression of  
411 endometrial autografts in a rat model of endometriosis treated with etanercept.  
412 *European Journal of Obstetrics & Gynecology and Reproductive Biology*. 2011; 159:  
413 184–189.

- 414 25. Oz M, Cetinkaya N, Bas S, Korkmaz E, Ozgu E, Terzioglu GS. et al. A randomized  
415 controlled experimental study of the efficacy of platelet-rich plasma and hyaluronic  
416 acid for the prevention of adhesion formation in a rat uterine horn model. *Arch*  
417 *Gynecol Obstet.* 2016; 294: 533–540.
- 418 26. Xu Z, Yin W, Zhang Y, Qi X, Chen Y, Xie X, et al. Comparative evaluation of  
419 leukocyte- and platelet-rich plasma and pure platelet-rich plasma for cartilage  
420 regeneration. *Sci Rep.* 2017; 7: 43301.
- 421 27. Ata B, Uncu G. Impact of endometriomas and their removal on ovarian reserve. *Curr*  
422 *Opin Obstet Gynecol.* 2015; 27: 235–241.
- 423 28. Somigliana E, Berlanda N, Benaglia L, Vigano P, Vercellini P, Fedele L. Surgical  
424 excision of endometriomas and ovarian reserve: a systematic review on serum  
425 antimullerian hormone level modifications. *Fertil Steril.* 2012; 98: 1531–1538
- 426 29. Kondo W, Bourdel N, Tamburro S, Cavoli D, Jardon K, Rabischong B. et al  
427 Complications after surgery for deeply infiltrating pelvic endometriosis. *BJOG.* 2011;  
428 118(3): 292-8.
- 429 30. Zwiép T, Humphrey R, Fortin D, Inculet RI, Malthaner RA. Autologous platelet rich  
430 plasma and concentrated platelet poor plasma are safe in patients requiring  
431 lobectomies but do not reduce the duration of air leak: a randomized controlled trial.  
432 *Ann SurgInt.* 2016; 2(2): ASI-2-011.
- 433 31. Le ADK et al. Platelet-Rich Plasma. *Clin Sports Med.* 2019; 38(1): 17-44.
- 434 32. Yildirim G, Attar R, Ficicioglu C, Karateke A, Ozkan F, Yesildaglar N. Etanercept  
435 causes regression of endometriotic implants in a rat model. *Arch Gynecol Obstet.*  
436 (2011) 283: 1297–1302
- 437 33. Bedaiwy S, Gupta J, Noriega J, Brainard A, Agarwal T, Falcone Diagnostic value of  
438 hemosiderin laden macrophages in histologically proven endometriosis. *Fertility and*  
439 *Sterility.* 2008 Sep; 90: Supplement page S438
- 440 34. Bedaiwy MA, Noriega J, Abdel Aleem M, Gupta S, AbulHassan AM, Brainard J. et  
441 al. Evaluation of peritoneal fluid hemosiderin-laden macrophages in biopsy-proven  
442 endometriosis. *Anal Quant Cytol Histol.* 2012; 34(1): 23-7.
- 443 35. Zadehmodarres S, Salehpour S, Saharkhiz N, Nazari L. Treatment of thin  
444 endometrium with autologous platelet-rich plasma: a pilot study. *JBRA Assisted*  
445 *Reproduction.* 2017; 21(1): 54-56

- 446 36. Chang Y, Li J, Chen Y, Wei L, Yang X, Shi Y, Liang X. Autologous platelet-rich  
447 plasma promotes endometrial growth and improves pregnancy outcome during in vitro  
448 fertilization. *Int J Clin Exp Med*. 2015; 8(1): 1286-1290.
- 449 37. Farimani M, Poorolajal J, Rabiee S, Bahmanzadeh M. Successful pregnancy and live  
450 birth after intrauterine administration of autologous platelet-rich plasma in a woman  
451 with recurrent implantation failure: A case report . *Int J Reprod BioMed*. 2017; 15  
452 (12): 803-806.
- 453 38. Farimani M, Bahmanzadeh M, Poorolajal J. A New Approach Using Autologous  
454 Platelet-Rich Plasma to Treat Infertility and To Improve Population Replacement  
455 Rate. *J Res Health Sci*. 2016; 16(3): 172-173.
- 456 39. Reghini MFS, Ramires Neto C, Segabinazzi LG, Castro Chaves, Dell'Aqua Cd,  
457 Bussiere MCC.et al. Inflammatory Response in Chronic Degenerative Endometritis  
458 Mares Treated with Platelet-Rich Plasm. *Theriogenology*. 2016; 15; 86(2): 516-22.
- 459 40. Anitua E, Andia I, Ardanza B, Nurden P, Nurden AT. Autologous platelets as a source  
460 of proteins for healing and tissue regeneration. *Thromb Haemost*. 2004; 91: 4–15.
- 461 41. Gentile P, Orlandi A, Scioli MG, Di Pasquali C, Bocchini I, Cervelli V.  
462 Concisereview: adipose-derived stromal vascular fraction cells and platelet-  
463 richplasma: basic and clinical implications for tissue engineering therapies  
464 inregenerative surgery. *Stem Cells Transl Med*. 2012; 1: 230–6.
- 465 42. Başbuğ M, Arıkanoğlu Z. Formation And Clinical İmportance Of Postoperative  
466 Peritoneal Adhesions. *J Clin Exp Invest*. 2010; 1(2): 134-137
- 467 43. Zhang XL, Shi KQ, Jia PT, Jiang LH, Liu YH, Chen X.et al. Effects of platelet-rich  
468 plasma on angiogenesis and osteogenesis-associated factors in rabbits with avascular  
469 necrosis of the femoral head. *Eur Rev Med Pharmacol Sci*. 2018; 22(7): 2143-2152.
- 470 44. Bastu E, Mutlu MF, Yasa C, Attar NE. Endometriosis and immunology. 2013; 1(2):  
471 54-62
- 472 45. Kupker W, Schultze-Mosgau A, Diedrich K. Paracrine changes in the peritoneal  
473 environment of women with endometriosis. *Hum Reprod Update*. 2000; 4(5): 719-  
474 723.
- 475 46. Ergenoğlu AM, Yeniel AÖ, Erbaş O, Aktuğ H, Yildirim N, Ulukuş M. et al.  
476 Regression of endometrial implants by resveratrol in an experimentally induced  
477 endometriosis model in rats. *Reprod Sci*. 2013; 20(10): 1230-6.
- 478 47. Imai S, Kumagai K, Yamaguchi Y, Miyatake K, Saito T. Platelet-Rich Plasma  
479 Promotes Migration, Proliferation, and the Gene Expression of Scleraxis and Vascular

- 480           Endothelial Growth Factor in Paratenon-Derived Cells In Vitro. *Sports Health*. 2012;  
481           40(5): 1035-45
- 482       48. Canbeyli İD, Akgun RC, Sahin O, Terzi A, Tuncay İC. Platelet-rich plasma decreases  
483           fibroblastic activity and woven bone formation with no significant  
484           immunohistochemical effect on long-bone healing: An experimental animal study with  
485           radiological outcomes. *J Orthop Surg (Hong Kong)*. 2018; 26(3): 2309499018802491.
- 486       49. Rodrigues BL, Montalvão SA, Cancela RB, Silva FA, Urban A, Huber SC. et al.  
487           “Treatment of male pattern alopecia with platelet-rich plasma: a double blind  
488           controlled study with analysis of platelet number and growth factor levels”. *Journal of*  
489           *the American Academy of Dermatology* 2019; 80(3): 694-700.
- 490       50. Chen CH, Cao Y, Wu YF, Bais AJ, Gao JS, Tang JB. Tendon healing in vivo: gene  
491           expression and production of multiple growth factors in early tendon healing period. *J*  
492           *Hand Surg*. 2008; 33: 1834–42.
- 493       51. Marini GM, Perrini C, Esposti P, Corradetti B, Bizzaro D, Riccaboni P, et. al. Effects  
494           of platelet-rich plasma in a model of bovine endometrial inflammation in vitro Maria  
495           Giovanna. *Reproductive Biology and Endocrinology*. 2016; 14(1): 58.
- 496       52. Menchisheva Y, Mirzakulova U, Yui R. Use of platelet-rich plasma to facilitate  
497           wound healing. *Int Wound J*. 2019; 16(2): 343-353.
- 498       53. Wang K, Li Z, Li J, Liao W, Qin Y, Zhang N. et al. Optimization of the Platelet-Rich  
499           Plasma Concentration for Mesenchymal Stem Cell Applications. *Tissue Eng Part A*.  
500           2019; 25(5-6): 333-351.

1

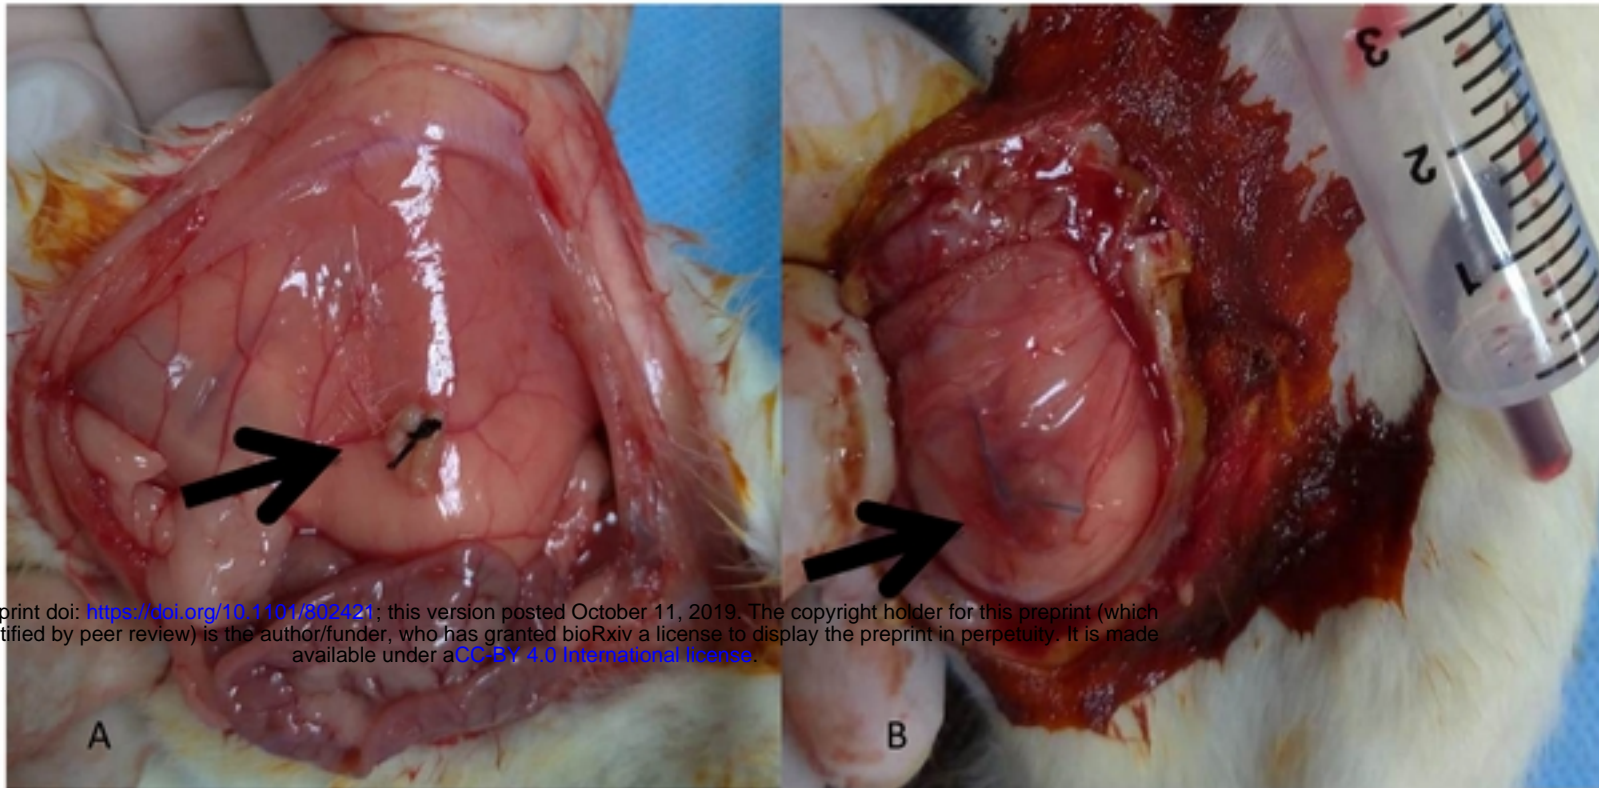

3 Figure 1: The endometrial focus on the inner abdominal surface of the rat

4 A: Endometrial focus implantation, 1<sup>th</sup> day. B: Endometriosis implant, 30<sup>th</sup> day.

5

6

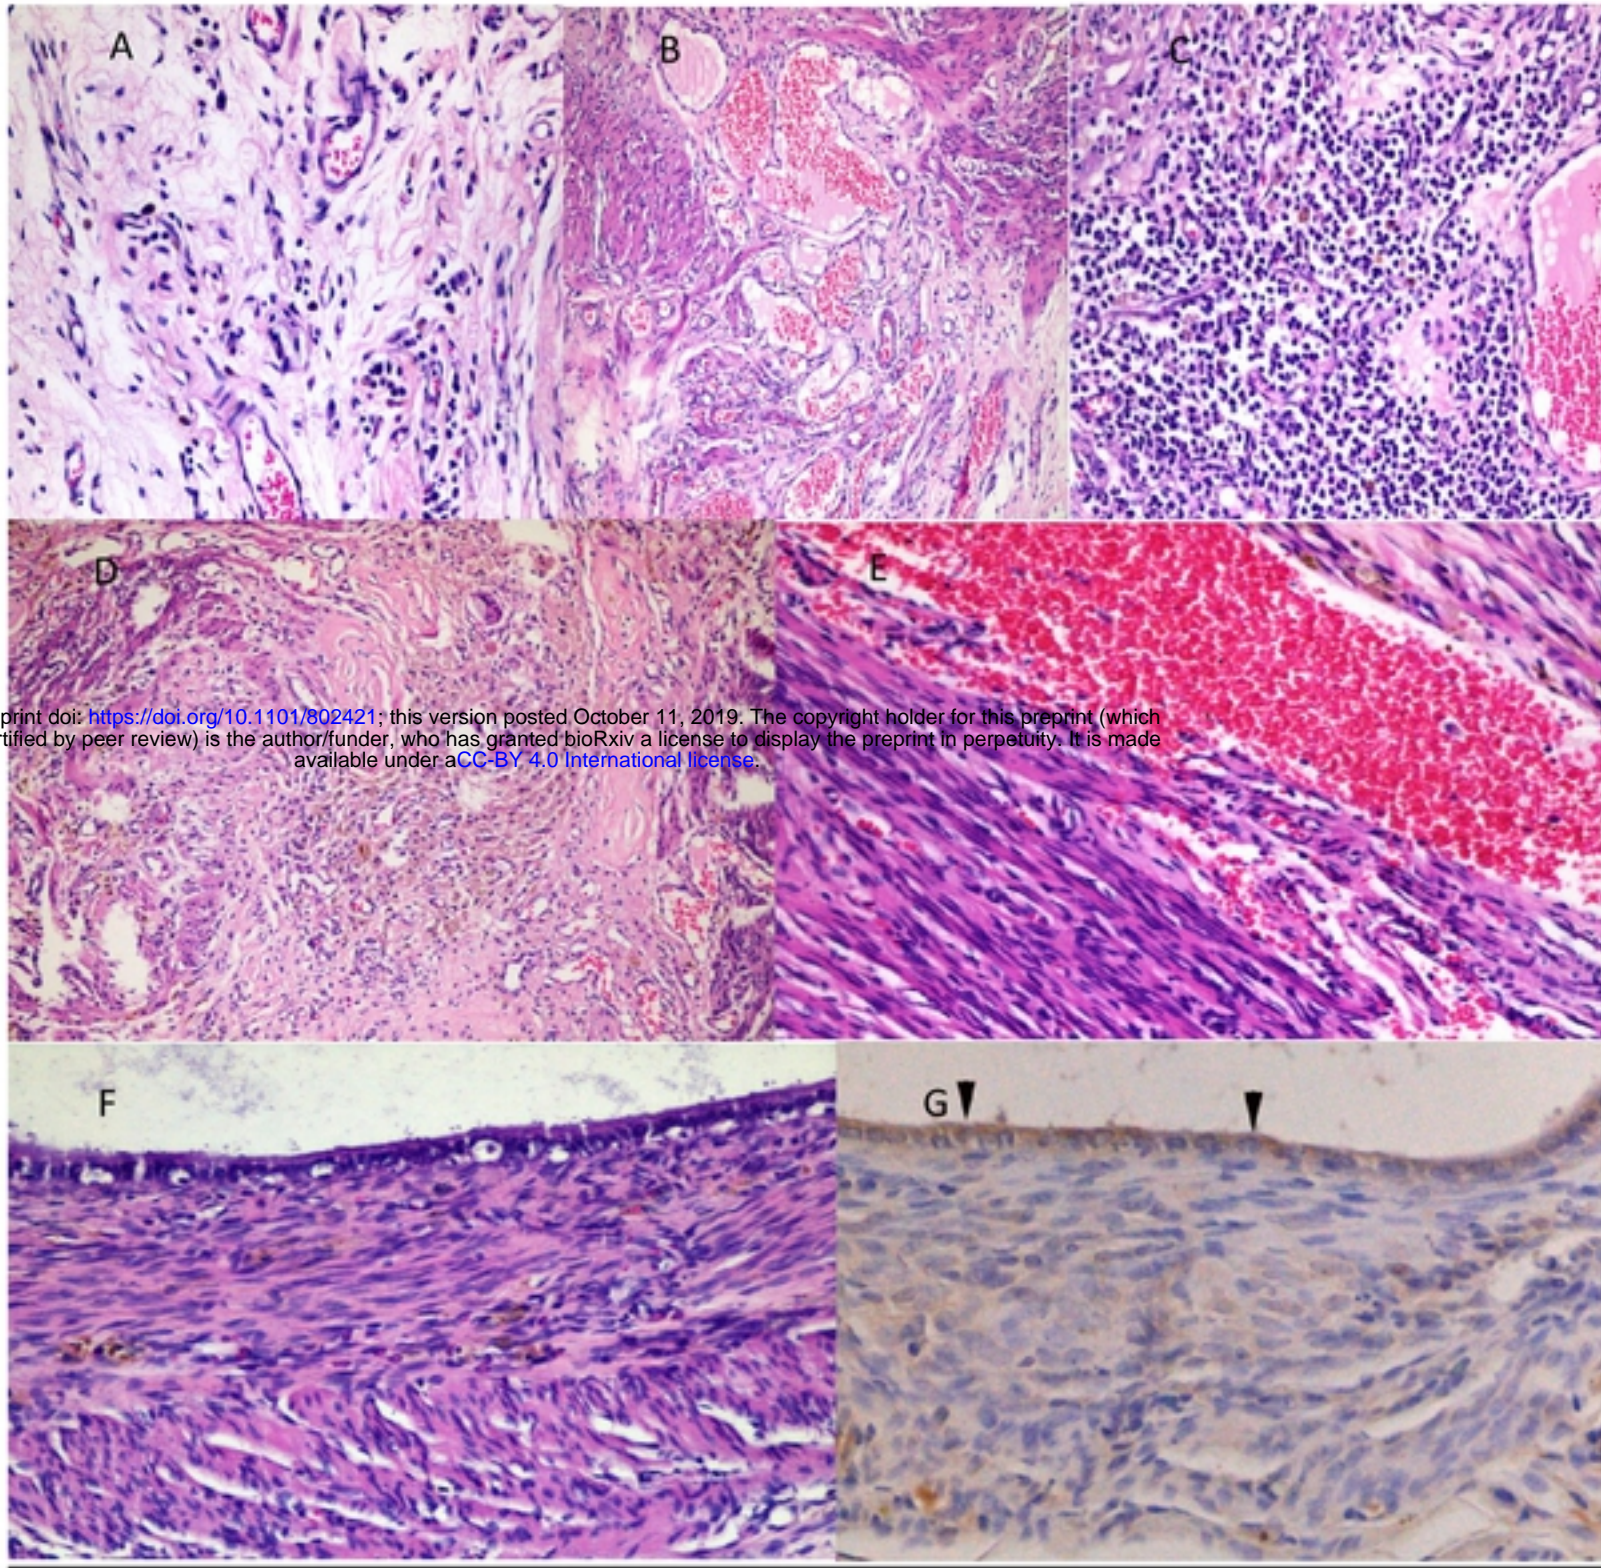

bioRxiv preprint doi: <https://doi.org/10.1101/802421>; this version posted October 11, 2019. The copyright holder for this preprint (which was not certified by peer review) is the author/funder, who has granted bioRxiv a license to display the preprint in perpetuity. It is made available under aCC-BY 4.0 International license.

10 Figure 2: Histopathological appearance and immunohistochemical staining of endometrial  
 11 implants

12 A: Positive edema (H&E  $\times$  400) B: Numerous dilated vascular structures (H&E  $\times$  200) C:  
 13 Dense mixed inflammatory cells (H&E  $\times$  400) D: Diffuse hemosiderin pigment (H&E  $\times$  200)  
 14 E: Extensive new bleeding area (H&E  $\times$  400) F: VEGF positivity in epithelial line ( $\times$  400) G:  
 15 Epithelial line (H&E  $\times$  400)

16  
 17  
 18  
 19

bioRxiv preprint doi: <https://doi.org/10.1101/802421>; this version posted October 11, 2019. The copyright holder for this preprint (which was not certified by peer review) is the author/funder, who has granted bioRxiv a license to display the preprint in perpetuity. It is made available under aCC-BY 4.0 International license.

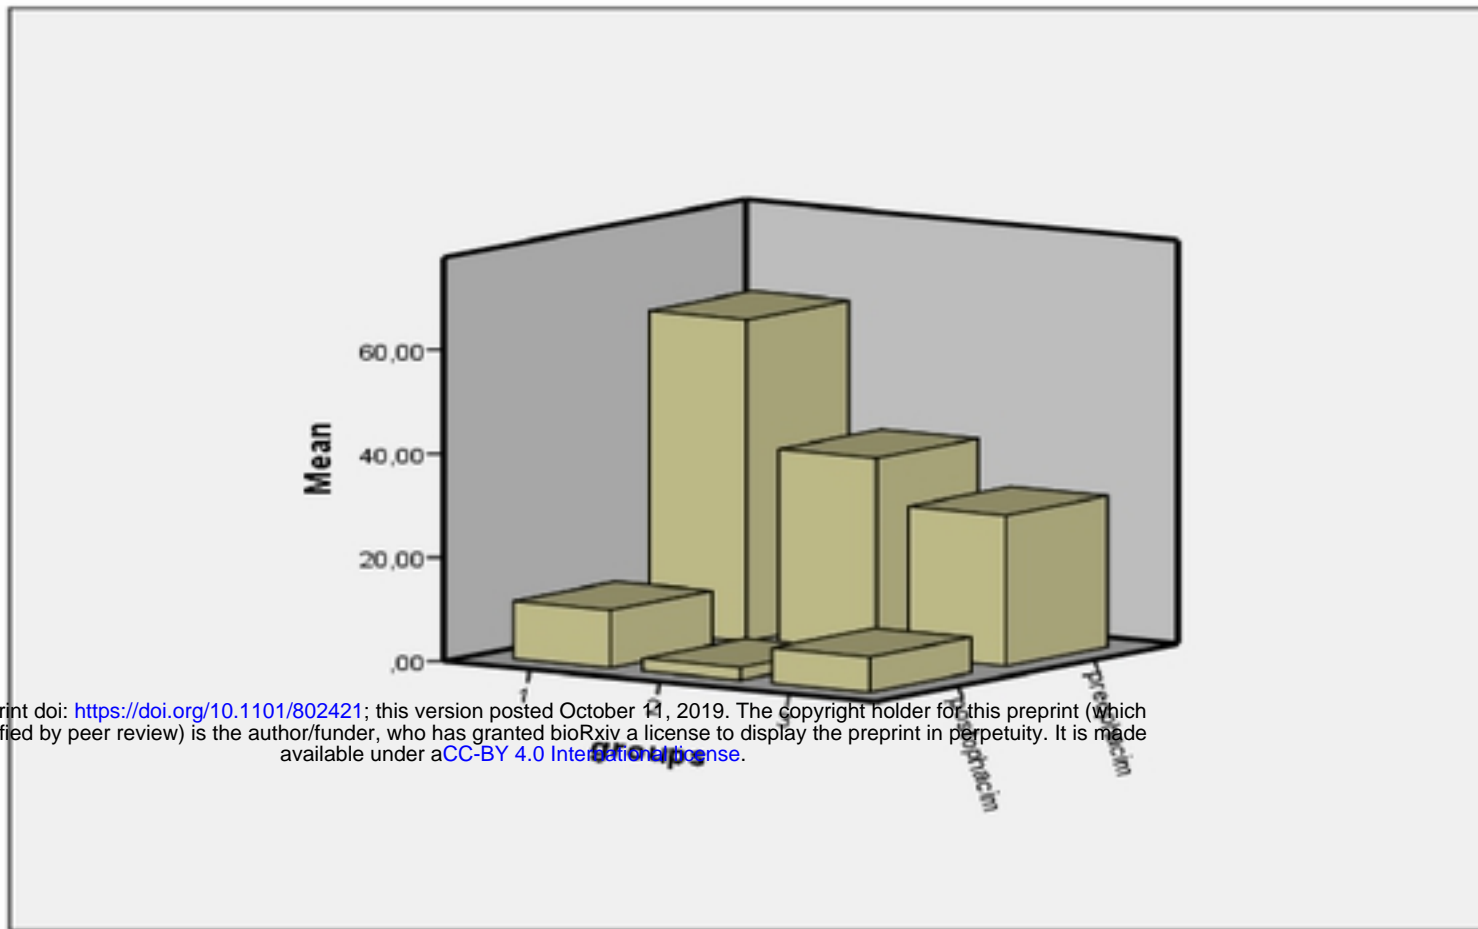

20

21 Figure 3: Pre and post implant volumes

22
